# Supplementary material
Source: publisher figshare collection journal article supplement (https://gsajournals.figshare.com/ndownloader/files/22247598)
Supplement: Supplementary file 1 [file 22247598]

## Sheet: Sheet1
#Supplementary Table S1. Percentage of mapped reads in each sample.
sample	Total reads (raw)	Total reads (trimmed)	mapped reads	percentage of mapped reads
Col_1h_H_R1	6216907	6191958	4256401	0.687408
Col_1h_H_R2	5151795	5127990	3592554	0.700577
Col_1h_H_R3	5911356	5881789	4458369	0.757995
Col_1h_H_R4	4549690	4528263	3594925	0.793886
Col_1h_L_R1	6082280	6050747	3750425	0.619828
Col_1h_L_R2	5586149	5559814	3914817	0.704127
Col_1h_L_R3	5989683	5962104	4902759	0.82232
Col_1h_L_R4	4420116	4398770	3579271	0.813698
Col_49h_H_R1	5211089	5189018	4272902	0.823451
Col_49h_H_R2	2950073	2937077	2295634	0.781605
Col_49h_H_R3	5302579	5278067	4373360	0.828591
Col_49h_H_R4	5035309	5012669	4238278	0.845513
Col_49h_L_R1	6857724	6829460	5545657	0.81202
Col_49h_L_R2	3196895	3183284	2663805	0.83681
Col_49h_L_R3	5014680	4989847	4287658	0.859276
Col_49h_L_R4	4958870	4935979	4165669	0.84394
myc234_1h_H_R1	6627535	6598022	4764417	0.722098
myc234_1h_H_R2	6312740	6285930	4673579	0.743498
myc234_1h_H_R3	5426864	5402319	4318330	0.799347
myc234_1h_H_R4	4174939	4156280	3313975	0.797342
myc234_1h_L_R1	6981649	6946252	3967783	0.571212
myc234_1h_L_R2	6901957	6871195	5057598	0.736058
myc234_1h_L_R3	4216866	4197044	3234285	0.77061
myc234_1h_L_R4	4129665	4110588	3427127	0.833732
myc234_49h_H_R1	4801645	4780913	3963830	0.829095
myc234_49h_H_R2	7077855	7050433	5788754	0.821049
myc234_49h_H_R3	6359371	6330335	5025707	0.793909
myc234_49h_H_R4	5946604	5919680	5081560	0.858418
myc234_49h_L_R1	5009617	4986251	4078434	0.817936
myc234_49h_L_R2	5025020	5004216	4213235	0.841937
myc234_49h_L_R3	7132829	7095825	5775787	0.81397
myc234_49h_L_R4	6075602	6048574	5152853	0.851912
